# Supplementary material for: Consistency and flexibility in solving spatial tasks: different horses show different cognitive styles
Source: PubMed Central journal article supplement (PMC5707407; doi:10.1038/s41598-017-16729-z), 2017-11-29
Supplement: 41598_2017_16729_MOESM2_ESM.pdf [file 41598_2017_16729_MOESM2_ESM.pdf]

## Consistency and flexibility in solving spatial tasks: different horses show different cognitive styles

Paolo Baragli <sup>1,4\*</sup>, Valentina Vitale <sup>2</sup>, Claudio Sighieri <sup>1</sup>, Antonio Lanatà <sup>3</sup>, Elisabetta Palagi <sup>4,5</sup>, Adam R Reddon <sup>6,7</sup>

1 Department of Veterinary Sciences, University of Pisa, Italy.

2 Unitat Equina, Fundació Hospital Clinic Veterinari, Universitat Autònoma de Barcelona, Spain.

3 Department of Information Engineering & Research Center “E. Piaggio”, School of Engineering, University of Pisa, Pisa, Italy.

4 Museum of Natural History, University of Pisa, Italy.

5 Institute of Cognitive Sciences and Technologies, National Research Council, Rome, Italy.

6 Department of Biology, McGill University, Montréal, Canada.

7 Current address: School of Natural Sciences and Psychology, Liverpool John Moores University, Liverpool, UK.

Corresponding author:

\*Paolo Baragli

Department of Veterinary Sciences, University of Pisa, Viale delle Piagge, 2, 56124, Pisa (Italy)

Email: [paolo.baragli@unipi.it](mailto:paolo.baragli@unipi.it)

Table 1 Supplementary materials. Laterality index of each horse and relative changes between symmetric and asymmetric barrier.

| Horse ID         | Laterality Index (Symmetric barrier) | Laterality Index (Asymmetric barrier) | Wilcoxon's signed ranks test <sup>a</sup> |
|------------------|--------------------------------------|---------------------------------------|-------------------------------------------|
| H1 (1)           | 0,867                                | 0,600                                 |                                           |
| H3 (1)           | 0,467                                | 0,067                                 |                                           |
| H5 (1)           | 0,867                                | 0,067                                 |                                           |
| H7 (1)           | 0,733                                | 0,867                                 |                                           |
| H8 (1)           | 0,333                                | 0,200                                 |                                           |
| H9 (1)           | 0,867                                | 1,000                                 |                                           |
| H16 (1)          | 0,200                                | 0,600                                 |                                           |
| H17 (1)          | 0,333                                | 0,067                                 |                                           |
| H19 (1)          | 0,067                                | 0,333                                 |                                           |
| H21 (1)          | 0,067                                | 0,867                                 |                                           |
| H22 (1)          | 0,867                                | 0,467                                 |                                           |
| H24 (1)          | 0,067                                | 0,333                                 |                                           |
| <b>Mean ± SD</b> | <b>0.48 ± 0.34</b>                   | <b>0.46 ± 0.33</b>                    | <b>Z = -0.315 P = 0.753</b>               |
| H2 (2)           | 1,000                                | 0,867                                 |                                           |
| H6 (2)           | 1,000                                | 0,067                                 |                                           |
| H10 (2)          | 1,000                                | 0,600                                 |                                           |
| H11 (2)          | 1,000                                | 0,867                                 |                                           |
| H12 (2)          | 1,000                                | 0,733                                 |                                           |
| H14 (2)          | 1,000                                | 0,600                                 |                                           |
| H20 (2)          | 1,000                                | 0,600                                 |                                           |
| H26 (2)          | 1,000                                | 0,600                                 |                                           |
| <b>Mean ± SD</b> | <b>1.00 ± 0.00</b>                   | <b>0.62 ± 0.25</b>                    | <b>Z = -2.555 P = 0.011</b>               |
| H4 (3)           | 1,000                                | 1,000                                 |                                           |
| H13 (3)          | 1,000                                | 1,000                                 |                                           |
| H15 (3)          | 1,000                                | 1,000                                 |                                           |
| H18 (3)          | 1,000                                | 1,000                                 |                                           |
| H23 (3)          | 1,000                                | 1,000                                 |                                           |
| H25 (3)          | 1,000                                | 1,000                                 |                                           |
| <b>Mean ± SD</b> | <b>1.00 ± 0.00</b>                   | <b>1.00 ± 0.00</b>                    | <b>Z = 0 P = 1.000</b>                    |

(1) Directionally flexible horses who detoured the barrier on both sides; (2) horses shifted from directionally consistent bias to directionally flexible response; (3) horses which were directionally consistent in both task. <sup>a</sup> Asymp. Sig. (2-tailed) with normalized Laterality Index.
